# Supplementary material for: Radiomics approach to distinguish between well differentiated liposarcomas and lipomas on MRI
Source: PubMed Central journal article supplement — Br J Surg. 2019 Nov 20;106(13):1800–9. doi: 10.1002/bjs.11410 (PMC6899528; doi:10.1002/bjs.11410), 2019-11-20
Supplement: BJS-106-1800-s001.pdf [file BJS-106-1800-s001.pdf]

**Table S1.** Several properties of the acquisition protocols of the 116 T1-weighted MRI sequences of patients with lipoma or well-differentiated liposarcoma (WDLPS) that were used to build the radiomics model.

| <b>Property</b>                | <b>N</b>    | <b>%</b>    |             |             |
|--------------------------------|-------------|-------------|-------------|-------------|
| <b>Magnetic field strength</b> |             |             |             |             |
| 1T                             | 10          | 9.6         |             |             |
| 1.5T                           | 98          | 84.5        |             |             |
| 3T                             | 8           | 6.9         |             |             |
| <b>Manufacturer</b>            |             |             |             |             |
| Siemens                        | 45          | 38.8        |             |             |
| Philips                        | 45          | 38.8        |             |             |
| GE                             | 26          | 22.4        |             |             |
| <b>Setting (Unit)</b>          | <b>Mean</b> | <b>Std.</b> | <b>Min.</b> | <b>Max.</b> |
| Slice Thickness (mm)           | 4.77        | 1.14        | 2.5         | 10.0        |
| Repetition time (ms)           | 555         | 108         | 280         | 831         |
| Echo time (ms)                 | 13.2        | 4.3         | 5.7         | 37          |
| <b>Available MRI sequences</b> | <b>N</b>    | <b>%</b>    |             |             |
| T1                             | 116         | 100         |             |             |
| T1-FS                          | 55          | 47.4        |             |             |
| T1-GD                          | 42          | 36.2        |             |             |
| T1-FS-GD                       | 80          | 69.0        |             |             |
| T2                             | 76          | 65.5        |             |             |
| T2-FS                          | 92          | 79.3        |             |             |

Std.: standard deviation, min.: minimum value, max.: maximum value, mm: millimeters, ms: milliseconds, FS: Fat Saturation, GD: gadolinium contrast.

**Table S2.** Performance of the radiomics models based on T1 imaging features only; patient features only; manually scored features only; the combination of T1 imaging and manually scored features; and of volume only on the full dataset. Performance for the radiomics models is reported for each experiment as mean [95% confidence interval] over the cross-validation iterations.

|                    | <b>Model 1</b><br>T1 imaging features | <b>Model 2</b><br>Patient features | <b>Model 3</b><br>Manually scored<br>features | <b>Model 4</b><br>T1 imaging +<br>manually scored<br>features | <b>Model 5</b><br>Volume |
|--------------------|---------------------------------------|------------------------------------|-----------------------------------------------|---------------------------------------------------------------|--------------------------|
| <b>AUC</b>         | <b>0.83</b> [0.75, 0.90]              | <b>0.75</b> [0.64, 0.85]           | <b>0.72</b> [0.62, 0.81]                      | <b>0.69</b> [0.58, 0.79]                                      | <b>0.83</b> [0.75, 0.91] |
| <b>Accuracy</b>    | <b>0.68</b> [0.67, 0.84]              | <b>0.68</b> [0.59, 0.76]           | <b>0.67</b> [0.57, 0.76]                      | <b>0.61</b> [0.51, 0.70]                                      | <b>0.76</b> [0.67, 0.84] |
| <b>Sensitivity</b> | <b>0.68</b> [0.53, 0.82]              | <b>0.77</b> [0.63, 0.90]           | <b>0.76</b> [0.58, 0.94]                      | <b>0.53</b> [0.37, 0.68]                                      | <b>0.67</b> [0.52, 0.81] |
| <b>Specificity</b> | <b>0.84</b> [0.72, 0.95]              | <b>0.59</b> [0.45, 0.72]           | <b>0.57</b> [0.43, 0.71]                      | <b>0.69</b> [0.54, 0.84]                                      | <b>0.84</b> [0.71, 0.97] |
| <b>NPV</b>         | <b>0.73</b> [0.63, 0.82]              | <b>0.73</b> [0.61, 0.85]           | <b>0.73</b> [0.59, 0.86]                      | <b>0.60</b> [0.50, 0.69]                                      | <b>0.75</b> [0.66, 0.83] |
| <b>PPV</b>         | <b>0.82</b> [0.70, 0.93]              | <b>0.66</b> [0.58, 0.73]           | <b>0.64</b> [0.54, 0.74]                      | <b>0.64</b> [0.51, 0.76]                                      | <b>0.81</b> [0.69, 0.93] |

AUC: area under the curve, NPV: negative predictive value, PPV: positive predictive value

**Table S3.** Performance of radiomics models trained on features extracted from various MRI sequences on the full dataset. Performance is reported as mean [95% confidence interval] over the cross-validation iterations.

|                    | <b>T1</b>                | <b>T1 + T1-FS</b>        | <b>T1 + T1-GD</b>        | <b>T1 + T1-FS-GD</b>     | <b>T1 + T2</b>           | <b>T1 + T2-FS</b>        |
|--------------------|--------------------------|--------------------------|--------------------------|--------------------------|--------------------------|--------------------------|
| <b>AUC</b>         | <b>0.83</b> [0.75, 0.90] | <b>0.84</b> [0.75, 0.92] | <b>0.81</b> [0.72, 0.90] | <b>0.81</b> [0.73, 0.89] | <b>0.89</b> [0.83, 0.95] | <b>0.81</b> [0.73, 0.88] |
| <b>Accuracy</b>    | <b>0.68</b> [0.67, 0.84] | <b>0.77</b> [0.69, 0.85] | <b>0.76</b> [0.67, 0.84] | <b>0.75</b> [0.66, 0.83] | <b>0.81</b> [0.74, 0.87] | <b>0.74</b> [0.66, 0.81] |
| <b>Sensitivity</b> | <b>0.68</b> [0.53, 0.82] | <b>0.69</b> [0.56, 0.82] | <b>0.69</b> [0.56, 0.82] | <b>0.66</b> [0.51, 0.81] | <b>0.74</b> [0.61, 0.86] | <b>0.66</b> [0.53, 0.79] |
| <b>Specificity</b> | <b>0.84</b> [0.72, 0.95] | <b>0.84</b> [0.73, 0.95] | <b>0.77</b> [0.71, 0.83] | <b>0.84</b> [0.72, 0.95] | <b>0.88</b> [0.78, 0.98] | <b>0.82</b> [0.70, 0.93] |
| <b>NPV</b>         | <b>0.73</b> [0.63, 0.82] | <b>0.74</b> [0.65, 0.82] | <b>0.73</b> [0.64, 0.82] | <b>0.72</b> [0.63, 0.81] | <b>0.78</b> [0.69, 0.86] | <b>0.72</b> [0.63, 0.80] |
| <b>PPV</b>         | <b>0.82</b> [0.70, 0.93] | <b>0.83</b> [0.72, 0.93] | <b>0.80</b> [0.69, 0.91] | <b>0.81</b> [0.69, 0.93] | <b>0.88</b> [0.78, 0.97] | <b>0.79</b> [0.68, 0.90] |

AUC: area under the curve, NPV: negative predictive value, PPV: positive predictive value, FS: Fat Saturation, GD: gadolinium contrast

**Table S4.** Performance of the three radiologists in differentiating between well-differentiated liposarcomas and lipomas on both the full and volume-matched cohort, and in differentiating dedifferentiated liposarcoma (DDLPS) and non-DDLPS (well-differentiated liposarcoma [WDLPS]/lipomas).

|                    | Full cohort |             |             | Volume-matched cohort |             |             | DDLPS vs. non-DDLPS |             |             |
|--------------------|-------------|-------------|-------------|-----------------------|-------------|-------------|---------------------|-------------|-------------|
|                    | Rad. 1      | Rad. 2      | Rad.3       | Rad. 1                | Rad. 2      | Rad. 3      | Rad. 1              | Rad. 2      | Rad. 3      |
| <b>AUC</b>         | <b>0.74</b> | <b>0.72</b> | <b>0.61</b> | <b>0.68</b>           | <b>0.74</b> | <b>0.55</b> | <b>0.97</b>         | <b>0.91</b> | <b>0.90</b> |
| <b>Accuracy</b>    | <b>0.64</b> | <b>0.64</b> | <b>0.61</b> | <b>0.62</b>           | <b>0.63</b> | <b>0.55</b> | <b>0.95</b>         | <b>0.62</b> | <b>0.89</b> |
| <b>Sensitivity</b> | <b>0.74</b> | <b>0.91</b> | <b>0.64</b> | <b>0.65</b>           | <b>0.88</b> | <b>0.60</b> | <b>0.95</b>         | <b>0.95</b> | <b>0.91</b> |
| <b>Specificity</b> | <b>0.55</b> | <b>0.36</b> | <b>0.59</b> | <b>0.58</b>           | <b>0.37</b> | <b>0.50</b> | <b>0.95</b>         | <b>0.56</b> | <b>0.89</b> |
| <b>NPV</b>         | <b>0.68</b> | <b>0.81</b> | <b>0.62</b> | <b>0.61</b>           | <b>0.74</b> | <b>0.54</b> | <b>0.99</b>         | <b>0.98</b> | <b>0.98</b> |
| <b>PPV</b>         | <b>0.62</b> | <b>0.59</b> | <b>0.61</b> | <b>0.62</b>           | <b>0.59</b> | <b>0.56</b> | <b>0.78</b>         | <b>0.29</b> | <b>0.61</b> |

AUC: area under the curve, NPV: negative predictive value, PPV: positive predictive value, rad.: radiologist
