# Supplementary material for: Radiomics approach to distinguish between well differentiated liposarcomas and lipomas on MRI
Source: PubMed Central journal article supplement — Br J Surg. 2019 Nov 20;106(13):1800–9. doi: 10.1002/bjs.11410 (PMC6899528; doi:10.1002/bjs.11410), 2019-11-20
Supplement: BJS-106-1800-s004.pdf [file BJS-106-1800-s004.pdf]

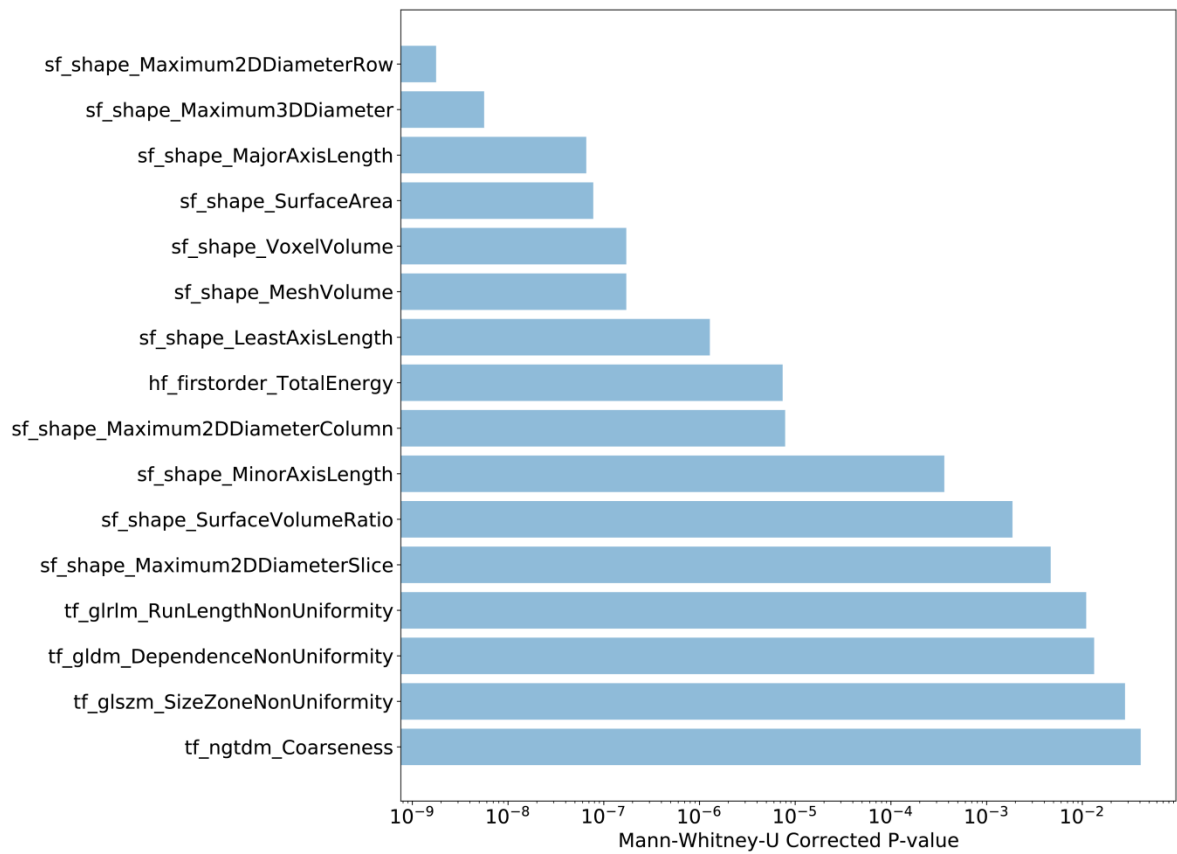

**Figure S2.** P-values of Mann-Whitney U tests of feature values for WDLPS and lipomas. Only the features that had a corrected P-value <0.05 were included in the graph. The labels on the y-axis correspond to the feature names: see Supplementary Materials 1 for more details.
